# Supplementary material for: Age-Related Histomorphological Changes in Human Kidneys: A Cadaveric Study
Source: Research Square preprint supplement (doi:10.21203/rs.3.rs-7317473/v1), 2025-08-12
Supplement: Supplementary file 1 [file 82e733b2318942fe881c1922.docx]

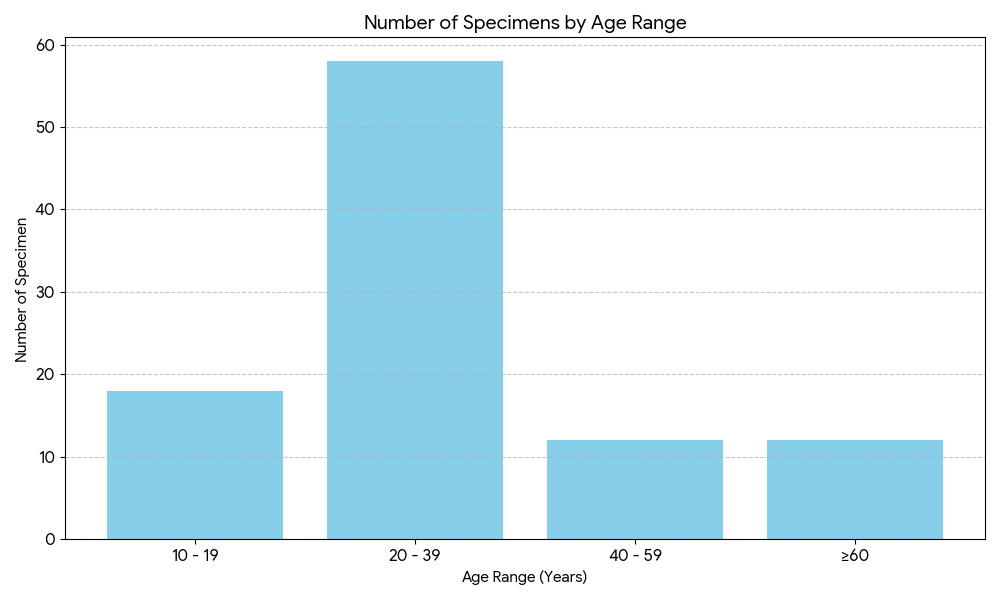


| **Age Group** | **Age Range** | **N** | **Left Kidney Mean ± SD (gm)** | **Left Kidney 95% CI (gm)** | **Right Kidney Mean ± SD (gm)** | **Right Kidney 95% CI (gm)** |
| --- | --- | --- | --- | --- | --- | --- |
| A | 10–19 | 9 | 85.04 ± 2.30 | 83.27 – 86.81 | 84.88 ± 2.03 | 83.32 – 86.45 |
| B | 20–39 | 29 | **98.67 ± 3.95** | 97.17 – 100.17 | **95.80 ± 7.05** | 89.31 – 102.29 |
| C | 40–59 | 6 | 94.75 ± 0.95 | 93.76 – 95.75 | 94.84 ± 1.47 | 93.28 – 96.39 |
| D | ≥60 | 6 | 85.33 ± 2.48 | 82.72 – 87.95 | 85.19 ± 2.64 | 82.41 – 87.97 |

**Table 1: Kidney Weights (gm) Across Different Age Groups**

| **Kidney** | **F-value** | **p-value** | **Interpretation** |
| --- | --- | --- | --- |
| Left Kidney | 3.604 | 0.001 | Statistically significant difference (p<0.001) |
| Right Kidney | 95.871 | 0.001 | Statistically significant difference (p<0.001) |

***ANOVA Test Results**

| **Age Group** | **Age Range** | **N** | **Left Kidney Mean ± SD (cm)** | **Left Kidney 95% CI (cm)** | **Right Kidney Mean ± SD (cm)** | **Right Kidney 95% CI (cm)** |
| --- | --- | --- | --- | --- | --- | --- |
| A | 10–19 | 9 | 8.44 ± 0.87 | 8.11 – 8.78 | 8.45 ± 0.40 | 8.14 – 8.76 |
| B | 20–39 | 29 | **9.56 ± 0.98** | 8.63 – 9.70 | **9.41 ± 1.03** | 8.33 – 9.50 |
| C | 40–59 | 6 | 8.55 ± 0.50 | 8.01 – 9.08 | 8.70 ± 0.40 | 8.27 – 9.12 |
| D | ≥60 | 6 | 8.42 ± 0.27 | 8.21 – 8.63 | 8.38 ± 1.08 | 7.96 – 8.79 |

**Table 2: Kidney Lengths (cm) Across Different Age Groups**

| **Age Group** | **Age Range** | **N** | **Left Kidney Breadth<br>Mean ± SD (cm)** | **95% CI Left Kidney (cm)** | **Right Kidney Breadth<br>Mean ± SD (cm)** | **95% CI Right Kidney (cm)** |
| --- | --- | --- | --- | --- | --- | --- |
| A | 10–19 | 9 | 4.06 ± 0.37 | 3.77 – 4.35 | 3.82 ± 0.28 | 3.60 – 4.04 |
| B | 20–39 | 29 | **4.16 ± 0.44** | 3.99 – 4.33 | **3.95 ± 0.57** | 3.73 – 4.16 |
| C | 40–59 | 6 | 4.05 ± 0.36 | 3.66 – 4.43 | 3.76 ± 0.21 | 3.54 – 3.99 |
| D | ≥60 | 6 | 3.88 ± 0.62 | 3.22 – 4.53 | 3.65 ± 0.34 | 3.50 – 3.80 |

**Table 3: Kidney Breadth (cm) Across Different Age Groups**

| **Age Group** | **Age Range** | **N** | **Left Kidney Thickness<br>Mean ± SD (cm)** | **95% CI Left Kidney (cm)** | **Right Kidney Thickness<br>Mean ± SD (cm)** | **95% CI Right Kidney (cm)** |
| --- | --- | --- | --- | --- | --- | --- |
| A | 10–19 | 9 | 3.04 ± 0.46 | 2.86 – 3.21 | 3.02 ± 0.36 | 2.66 – 3.20 |
| B | 20–39 | 29 | **3.28 ± 0.40** | 2.98 – 3.59 | **3.27 ± 0.30** | 3.04 – 3.51 |
| C | 40–59 | 6 | 3.07 ± 0.16 | 2.60 – 3.50 | 3.06 ± 0.58 | 2.45 – 3.68 |
| D | ≥60 | 6 | 2.73 ± 0.36 | 2.34 – 3.11 | 2.76 ± 0.44 | 2.29 – 3.23 |

**Table 4: Kidney Thickness (cm) Across Different Age Groups**

| **Age Group** | **Age Range** | **N** | **Left Kidney Volume (Mean ± SD)** | **95% CI Left Kidney (cm³)** | **Right Kidney Volume (Mean ± SD)** | **95% CI Right Kidney (cm³)** |
| --- | --- | --- | --- | --- | --- | --- |
| A | 10–19 | 9 | 58.07 ± 17.53 | 51.40 – 64.74 | 55.04 ± 6.63 | 49.93 – 60.14 |
| B | 20–39 | 29 | 58.18 ± 9.35 | 50.99 – 65.37 | 57.67 ± 17.86 | 50.88 – 64.47 |
| C | 40–59 | 6 | 58.17 ± 19.46 | 37.75 – 78.60 | 53.56 ± 20.43 | 28.19 – 78.93 |
| D | ≥60 | 6 | 47.72 ± 3.20 | 33.85 – 61.58 | 50.73 ± 8.16 | 42.17 – 59.29 |

**Table 5: Kidney Volume (cm³) Across Age Groups**

| **Age Group** | **Age Range** | **N** | **Left Kidney Glomeruli (Mean ± SD)** | **95% CI Left Kidney** | **Right Kidney Glomeruli (Mean ± SD)** | **95% CI Right Kidney** |
| --- | --- | --- | --- | --- | --- | --- |
| A | 10–19 | 5 | 8.48 ± 0.18 | 8.24 – 8.71 | 8.35 ± 0.20 | 8.10 – 8.61 |
| B | 20–39 | 5 | **9.33 ± 0.46** | 9.00 – 9.66 | **9.27 ± 0.44** | 8.95 – 9.59 |
| C | 40–59 | 5 | 8.20 ± 0.39 | 7.71 – 8.68 | 8.27 ± 0.42 | 7.74 – 8.79 |
| D | ≥60 | 5 | 7.85 ± 0.15 | 7.69 – 8.00 | 7.78 ± 0.19 | 7.57 – 7.98 |

**Table 6: Number of Glomeruli per mm² in Kidneys Across Age Groups**
